# Supplementary material
Source: publisher figshare collection journal article supplement (https://tandf.figshare.com/ndownloader/files/30824685)
Supplement: Supplementary file 1 [file 30824685]

| **Appendix F. EORTC-C30 quality of life scores** | | | | | | | | |
| --- | --- | --- | --- | --- | --- | --- | --- | --- |
|  | **Baseline N=76-78** | **Post RT N=78-85** | **3 months N=75-77** | **6 months N=80-81** | **12 months N=78-80** | **24 months N=73-76** | **36 months n=74-75** | **60 months n=55-57** |
| Global QoL, mean score | 78.8 | 69.4 | 76.0 | 74.9 | 70.5 | 74.2 | 72.3 | 75.3 |
| Physical function | 91.8 | 89.4 | 89.0 | 89.8 | 87.3 | 86.7 | 85.8 | 84.9 |
| Role function | 93.9 | 81.2 | 88.4 | 85.8 | 84.2 | 85.6 | 84.2 | 85.1 |
| Emotional function | 87.0 | 86.1 | 88.5 | 89.9 | 86.4 | 87.7 | 86.6 | 87.8 |
| Cognitive function | 92.9 | 89.2 | 88.6 | 87.9 | 84.6 | 85.6 | 83.3 | 83.9 |
| Social function | 92.6 | 87.6 | 87.9 | 91.2 | 85.8 | 86.1 | 83.8 | 87.3 |
